# Supplementary material
Source: MDPI journal article supplement (https://www.mdpi.com/1424-2818/15/6/777)
Supplement: s1 [file s1]

**Sexual selection and proteinaceous diversity in the femoral gland secretions  
of lacertid lizards**

Marco Mangiacotti, Marco Fumagalli, Simon Baeckens, José Martín, Stefano Scali, Roberto  
Sacchi

SUPPLEMENTARY MATERIAL

## Methods M1. Protocol details for mass spectrometry (MS) analysis

For the mass spectrometry analysis, we used a total of six samples of femoral gland secretions coming from six different males from the two species (*Acanthodactylus scutellatus*, *Gallotia stehlini*) showing the highest protein expression in the five molecular regions associated with male-biased SSD. Samples were chosen among those still available from the original collection used in previous works by two of the co-authors (SB and JM) and correctly preserved in freezer (-20 °C) till the time of current analysis. Details about sample size, localities, and collection year are synthesized below.

| Species                            | Samples size | Labels    | Year | Locality                                         |
|------------------------------------|--------------|-----------|------|--------------------------------------------------|
| <i>Acanthodactylus scutellatus</i> | 4            | Acascu001 | 2014 | Israel<br>32°N; 34.79°E                          |
|                                    |              | Acascu002 |      |                                                  |
|                                    |              | Acascu003 |      |                                                  |
|                                    |              | Acascu004 |      |                                                  |
| <i>Gallotia stehlini</i>           | 2            | Galste002 | 2013 | Gran Canaria (Canary Islands)<br>27.74°N; 15.6°W |
|                                    |              | Galste003 |      |                                                  |

From the fresh gels, we excised the bands of the regions of interest (Fig. S1), and individually prepared them for mass spectrometry analysis following [1]. Briefly, we completely de-stained the gel pieces by washing twice with 200 µL of 100 mM ammonium bicarbonate buffer pH 7.8, 50 % acetonitrile (ACN) and keeping under stirring overnight; we dehydrated the samples with 100 µL ACN; we performed reduction of the samples by adding 100 µL of 10 mM Dithiothreitol (DTT) solution (30 min at 37°C), replaced with 100 µL of 55 mM iodoacetamide for 45 min at 60°C; we washed the gel pieces twice with 200 µL of 100 mM ammonium bicarbonate for 10 min; we dehydrated by addition of 100 µL of ACN; we removed ACN and dried samples under vacuum; we performed protein digestion overnight at 37 °C by adding 100 µL of 100 mM ammonium bicarbonate buffer pH 7.8, containing 20 ng/µL sequencing grade trypsin (Promega, Madison, WI, USA); we extracted the obtained peptides by adding twice 100 µL of 50 % ACN in water, 5 % formic acid (FA), and pooling the supernatant from each step after stirring and centrifuging; we dried each pool and stored at -20°C until mass spectrometry analysis. Before mass spectrometry, peptide mixtures were solubilized in 100µL of 0.1% FA. Before mass spectrometry, peptide mixtures were solubilized in 100µL of 0.1% FA.

Mass spectrometry (MS) analyses were carried out with a LC unit (ExionLCTM AD) equipped with a column oven thermostated at 40°C, an autosampler cooled at 10 °C and a

binary gradient pump system. MS instrument consists of a high resolution QTOF mass spectrometer (AB Sciex X500B) equipped with a Turbo V Ion source and a Twin Sprayer ESI (electrospray ionization) probe, controlled by SCIEX OS 2.1 software. Peptides were separated by reverse phase (RP) HPLC on a Hypersil Gold (Thermo Fisher Scientific, USA) C18 column ( $150 \times 2.1$  mm, 3  $\mu$ m particle size, 175 Å pore size) using a linear gradient (2-50 % solvent B in 15 min) in which solvent A consisted of 0.1 % aqueous FA and solvent B of ACN containing 0.1% FA. Flow rate was 0.2 mL/min. Mass spectra were generated in positive polarity under constant instrumental conditions: ion spray voltage 4500 V, declustering potential 100 V, curtain gas 30 psi, ion source gas 1 40 psi, ion source gas 2 45 psi, temperature 350 °C, collision energy 10 V. Spectra were acquired with SCIEX OS 2.1 software.

**Fig. S1.** SDS-PAGE of the samples used to excise the bands associated with the SSD increase and analyzed by mass spectrometry (MS). *Top panel:* gel of the four samples of *Acanthodactylus scutellatus* (each run twice to ensure having enough protein concentration for MS) used for bands A and B highlighted in Fig. 3); *bottom panel:* gel of the two samples of *Gallotia stehlini* (each run twice) used for bands C, D, and E.

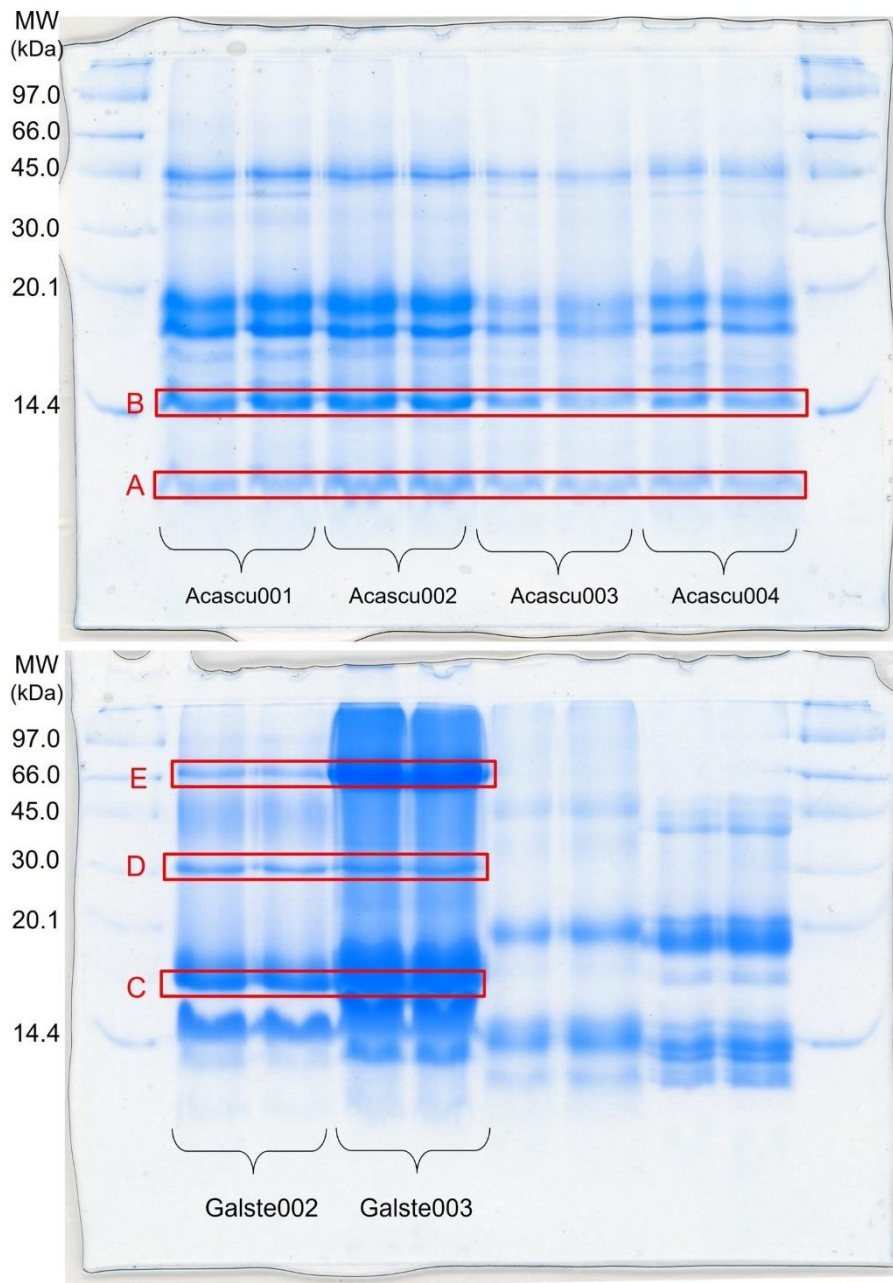

**Table S1.** Morphometrics measures used for the computation of the sexual dimorphism indexes: sexual size dimorphism (SSD) based on snout-to-vent length (SVL); sexual head dimorphism (SHD) based on the ratio between head length (HL) and SVL. See methods for computational details. Literature source of the data are reported in the last column.

| Species                              | SVL <sub>♂</sub> | HL <sub>♂</sub> | N <sub>♂</sub> | SVL <sub>♀</sub> | HL <sub>♀</sub> | N <sub>♀</sub> | SSD   | SHD   | Location                   | Reference |
|--------------------------------------|------------------|-----------------|----------------|------------------|-----------------|----------------|-------|-------|----------------------------|-----------|
| <i>Acanthodactylus opheodurus</i>    | 53.33            | 12.97           | 12             | 50.48            | 11.98           | 10             | 1.056 | 1.033 | Jordania, Saudi Arabia     | [2]       |
| <i>Acanthodactylus boskianus</i>     | 65.36            | 16.86           | 61             | 61.26            | 15.31           | 37             | 1.067 | 1.043 | Tunisia                    | [3]       |
| <i>Acanthodactylus schreiberi</i>    | 73.00            | 19.12           | 25             | 65.03            | 16.60           | 36             | 1.123 | 1.035 | Cyprus                     | [4]       |
| <i>Acanthodactylus scutellatus</i>   | 58.32            | 14.66           | 13             | 54.47            | 13.49           | 11             | 1.071 | 1.020 | Egypt                      | [2]       |
| <i>Acanthodactylus beershebensis</i> | 66.26            | 16.25           | 130            | 63.80            | 14.59           | 137            | 1.039 | 1.096 | Israel                     | [5]       |
| <i>Mesalina olivieri</i>             | 42.07            | 10.05           | 18             | 41.46            | 9.46            | 17             | 1.015 | 1.062 | Algeria, Egypt, Mauretania | [2]       |
| <i>Mesalina guttulata</i>            | 43.70            | 10.53           | 10             | 44.60            | 10.12           | 5              | 0.979 | 1.075 | Egypt                      | [6]       |
| <i>Holaspis guentheri</i>            | 45.93            | 11.75           | 6              | 46.46            | 12.22           | 6              | 0.988 | 0.962 | Tanzania                   | [2]       |
| <i>Podarcis gaigeae</i>              | 59.06            | 14.88           | 251            | 53.71            | 12.20           | 227            | 1.100 | 1.146 | Skyros                     | [7]       |
| <i>Podarcis milensis</i>             | 56.11            | 13.36           | 137            | 49.78            | 10.83           | 239            | 1.127 | 1.124 | Greece                     | [8]       |
| <i>Podarcis melisellensis</i>        | 60.90            | 14.90           | 25             | 51.30            | 11.50           | 13             | 1.187 | 1.121 | Croatia                    | [9]       |
| <i>Podarcis erhardii</i>             | 58.97            | 14.63           | 36             | 56.81            | 12.62           | 30             | 1.038 | 1.155 | mainland Greece            | [10]      |
| <i>Podarcis peloponnesiacus</i>      | 70.60            | 17.32           | 12             | 71.50            | 15.05           | 11             | 0.987 | 1.180 | Greece                     | [10]      |
| <i>Podarcis muralis</i>              | 57.23            | 20.52           | 39             | 57.10            | 17.69           | 42             | 1.002 | 1.245 | Spain                      | [11]      |
| <i>Podarcis liolepis</i>             | 47.75            | 19.81           | 47             | 46.42            | 16.61           | 48             | 1.029 | 1.272 | Spain                      | [12]      |
| <i>Podarcis vaucheri</i>             | 44.57            | 18.93           | 330            | 44.39            | 16.23           | 310            | 1.004 | 1.281 | Morocco, Spain             | [12]      |
| <i>Podarcis bocagei</i>              | 55.30            | 20.25           | 41             | 53.51            | 17.08           | 47             | 1.033 | 1.232 | Spain                      | [11]      |
| <i>Podarcis gadarramae</i>           | 51.29            | 17.38           | 33             | 50.12            | 14.79           | 30             | 1.023 | 1.224 | Spain                      | [13]      |
| <i>Podarcis carbonelli</i>           | 42.10            | 17.94           | 180            | 41.29            | 15.31           | 147            | 1.020 | 1.260 | Portugal                   | [12]      |
| <i>Zootoca vivipara</i>              | 47.91            | 15.75           | 18             | 53.64            | 15.10           | 34             | 0.880 | 1.120 | Spain                      | [11]      |
| <i>Algyroides moreoticus</i>         | 50.70            | 12.71           | 6              | 46.24            | 10.34           | 7              | 1.096 | 1.161 | Greece                     | [2]       |
| <i>Algyroides nigropunctatus</i>     | 63.24            | 16.64           | 12             | 56.16            | 13.54           | 9              | 1.126 | 1.124 | Croatia, Greece, Italy     | [2]       |
| <i>Dalmatolacerta oxycephala</i>     | 58.40            | 15.10           | 34             | 52.90            | 13.20           | 13             | 1.103 | 1.049 | Croatia                    | [9]       |
| <i>Phoenicolacerta kulzeri</i>       | 55.44            | 13.43           | 12             | 54.69            | 12.23           | 13             | 1.014 | 1.110 | Syria                      | [2]       |
| <i>Iberolacerta galani</i>           | 60.78            | 14.92           | 24             | 64.19            | 13.52           | 26             | 0.944 | 1.180 | Spain                      | [14]      |
| <i>Iberolacerta monticola</i>        | 63.12            | 15.46           | 14             | 63.19            | 13.41           | 18             | 0.999 | 1.170 | Spain                      | [2]       |
| <i>Iberolacerta cyreni</i>           | 63.48            | 15.04           | 49             | 65.29            | 13.58           | 79             | 0.971 | 1.154 | Spain                      | [15]      |
| <i>Iberolacerta bonnali</i>          | 52.01            | 11.96           | 67             | 54.61            | 11.69           | 80             | 0.950 | 1.088 | Spain                      | [16]      |
| <i>Lacerta media</i>                 | 107.72           | 23.69           | 17             | 95.61            | 20.36           | 14             | 1.127 | 1.042 | Armenia, Turkey            | [2]       |

|                             |        |       |    |        |       |    |       |       |                      |      |
|-----------------------------|--------|-------|----|--------|-------|----|-------|-------|----------------------|------|
| <i>Lacerta bilineata</i>    | 104.75 | 25.24 | 15 | 100.63 | 21.94 | 21 | 1.041 | 1.139 | France, Italy, Spain | [2]  |
| <i>Lacerta viridis</i>      | 107.15 | 37.55 | 14 | 108.54 | 33.10 | 13 | 0.987 | 1.187 | Spain                | [11] |
| <i>Lacerta schreiberi</i>   | 102.31 | 36.66 | 15 | 101.90 | 32.33 | 24 | 1.004 | 1.202 | Spain                | [11] |
| <i>Psammodromus algirus</i> | 63.38  | 14.75 | 32 | 61.15  | 13.33 | 30 | 1.036 | 1.088 | Spain                | [17] |
| <i>Gallotia stehlini</i>    | 189.10 | 48.20 | 16 | 156.80 | 35.60 | 25 | 1.206 | 1.165 | Canary Islands       | [18] |
| <i>Gallotia galloti</i>     | 109.65 | 28.18 | 56 | 93.33  | 22.13 | 83 | 1.175 | 1.113 | Canary Islands       | [19] |
| <i>Gallotia simonyi</i>     | 236.50 | 56.80 | 11 | 196.10 | 42.60 | 14 | 1.206 | 1.139 | Canary Islands       | [18] |

## References

1. Mangiacotti, M.; Fumagalli, M.; Cagnone, M.; Viglio, S.; Bardoni, A.M.; Scali, S.; Sacchi, R. Morph-Specific Protein Patterns in the Femoral Gland Secretions of a Colour Polymorphic Lizard. *Scientific Reports* **2019**, *9*, 8412, doi:10.1038/s41598-019-44889-7.
2. Baeckens, S.; Martín, J.; García-Roa, R.; Van Damme, R. Sexual Selection and the Chemical Signal Design of Lacertid Lizards. *Zoological Journal of the Linnean Society* **2018**, *183*, 445–457, doi:10.1093/zoolinnean/zlx075.
3. Nasri, I.; Hammouda, A.; Hamza, F.; Selmi, S. Sexual Size Dimorphism in a Tunisian Population of Bosk's Fringe-Toed Lizards *Acanthodactylus Boskianus Asper*. *African Journal of Herpetology* **2015**, *64*, 103–115, doi:10.1080/21564574.2015.1103786.
4. Yalçinkaya, D.; Göçmen, B. A New Subspecies from Anatolia, *Acanthodactylus Schreiberi* Boulenger, 1879 *Ataturi* n. Ssp. (Squamata: Lacertidae). *Biharean Biologist* **2012**, *6*, 19–31.
5. Moravec, J.; El Din, S.B.; Seligmann, H.; Sivan, N.; Werner, Y.L. Systematics and Distribution of the *Acanthodactylus Pardalis* Group (Lacertidae) in Egypt and Israel. *Zoology in the Middle East* **1999**, *17*, 21–50, doi:10.1080/09397140.1999.10637767.
6. Werner, Y.L.; Ashkenazi, S. Notes on Some Egyptian Lacertidae, Including a New Subspecies of *Mesalina*, Involving the Seligmann Effect. *Turkish Journal of Zoology* **2010**, *34*, 123–133, doi:10.3906/zoo-0905-8.
7. Runemark, A.; Sagonas, K.; Svensson, E.I. Ecological Explanations to Island Gigantism: Dietary Niche Divergence, Predation, and Size in an Endemic Lizard. *Ecology* **2015**, *96*, 2077–2092, doi:10.1890/14-1996.1.
8. Adamopoulou, C. Structure and Function of Epigeic Animal Communities with Emphasis in the Lizard *Podarcis Milensis* (Sauria: Lacertidae), in Insular Ecosystems of the Aegean. unpublished PhD dissertation, University of Athens, 1999.
9. Verwajen, D.; Van Damme, R.; Herrel, A. Relationships between Head Size, Bite Force, Prey Handling Efficiency and Diet in Two Sympatric Lacertid Lizards. *Functional Ecology* **2002**, *16*, 842–850, doi:10.1046/j.1365-2435.2002.00696.x.

10. Lymberakis, P.; Poulakakis, N.; Kaliontzopoulou, A.; Valakos, E.; Mylonas, M. Two New Species of *Podarcis* (Squamata: Lacertidae) from Greece. *Systematics and Biodiversity* **2008**, *6*, 307–318, doi:10.1017/S1477200008002727.
11. Braña, F. Sexual Dimorphism in Lacertid Lizards: Male Head Increase vs Female Abdomen Increase? *Oikos* **1996**, *75*, 511, doi:10.2307/3545893.
12. Kaliontzopoulou, A.; Carretero, M.A.; Llorente, G.A. Morphology of the *Podarcis* Wall Lizards (Squamata: Lacertidae) from the Iberian Peninsula and North Africa: Patterns of Variation in a Putative Cryptic Species Complex. *Zoological Journal of the Linnean Society* **2012**, *164*, 173–193, doi:10.1111/j.1096-3642.2011.00760.x.
13. Kaliontzopoulou, A.; Adams, D.C.; van der Meijden, A.; Perera, A.; Carretero, M.A. Relationships between Head Morphology, Bite Performance and Ecology in Two Species of *Podarcis* Wall Lizards. *Evolutionary Ecology* **2012**, *26*, 825–845, doi:10.1007/s10682-011-9538-y.
14. Arribas, O.; Carranza, S.; Odierna, G. Description Of A New Endemic Species Of Mountain Lizard From Northwestern Spain: *Iberolacerta Galani* Sp. Nov. (Squamata: Lacertidae). *Zootaxa* **2006**, *1240*, 1–55, doi:10.5281/zenodo.172862.
15. Arribas, O.; Carranza, S. Morphological and Genetic Evidence of the Full Species Status of *Iberolacerta Cyreni Martinezricai* (Arribas, 1996). *Zootaxa* **2004**, *634*, 1, doi:10.11646/zootaxa.634.1.1.
16. Arribas, Ó. Una Nueva Especie de Lagartija de Los Pirineos Orientales: *Lacerta (Archaeolacerta) Aurelioi* Sp. Nov. (Reptilia: Lacertidae). *Bollettino Museo Regionale di Scienze Naturali Torino* **1994**, *12*, 327–351.
17. Carretero, M.A.; Llorente, G.A. Morfometria de *Psammodromus Algirus* i *Acanthodactylus Erythrurus* al Delta De L'Ebre. *Buttl. Parc Natural de l'Ebre* **1994**, *8*, 19–26.
18. Lopez-Darias, M.; Vanhooydonck, B.; Cornette, R.; Herrel, A. Sex-Specific Differences in Ecomorphological Relationships in Lizards of the Genus *Gallotia*. *Functional Ecology* **2015**, *29*, 506–514, doi:10.1111/1365-2435.12353.
19. Herrel, A.; Spithoven, L.; Van Damme, R.; De Vree, F. Sexual Dimorphism of Head Size in *Gallotia Galloti*: Testing the Niche Divergence Hypothesis by Functional Analyses. *Functional Ecology* **1999**, *13*, 289–297, doi:10.1046/j.1365-2435.1999.00305.x.

**Table S2.** Complete list of the identified peptides from tandem MS. Band = gel region originating the sample (Figg. 3 and S1); ID = spectrum ID; score = MSGF+ spectrum E-value (-log10 transformed); error= difference between measured and calculated parental ion mass (Da); UniProtID = unique uniprotKB identifier; description = uniprotKB description; coverage = percent protein sequence covered by the identified peptide; MW = predicted molecular weight (kDa) of the corresponding protein. Peptides in bold refer to those showing FDR below 0.01.

| band | ID          | Peptide                                               | score        | error         | UniProt ID        | description                                                                                                | Coverage (%)  | MW           |
|------|-------------|-------------------------------------------------------|--------------|---------------|-------------------|------------------------------------------------------------------------------------------------------------|---------------|--------------|
| A    | 3336        | VAQLVSPR                                              | 6.814        | 1.020         | A0A670JJE1        | MAM domain containing 2                                                                                    | 0.95%         | 92.6         |
|      | 3009        | VDDGKLK                                               | 6.119        | 0.001         | A0A670ISX8        | Protein phosphatase 1 regulatory subunit 37                                                                | 1.03%         | 75.2         |
|      | <b>3544</b> | <b>SCIDTELCVGYGSASITSSMYIQSK</b>                      | <b>9.374</b> | <b>0.036</b>  | <b>A0A670IP55</b> | <b>UPAR/Ly6 domain-containing protein</b>                                                                  | <b>17.81%</b> | <b>15.8</b>  |
|      | <b>2948</b> | <b>AHDGIR</b>                                         | <b>8.026</b> | <b>-0.009</b> | <b>A0A670JC88</b> | <b>Zinc finger protein 436-like</b>                                                                        | <b>1.16%</b>  | <b>58.8</b>  |
|      | <b>2948</b> | <b>AHDGLR</b>                                         | <b>8.026</b> | <b>-0.009</b> | <b>A0A670JYQ1</b> | <b>SWI/SNF-related matrix-associated actin-dependent regulator of chromatin subfamily A-like protein 1</b> | <b>0.61%</b>  | <b>109.1</b> |
|      | 3270        | RPVLSPR                                               | 7.576        | -0.009        | A0A670KH22        | RBPJ-interacting and tubulin-associated protein 1                                                          | 2.56%         | 30.2         |
|      | 4154        | TWTCWGRILGSSTAAERWKPRRSTS                             | 7.538        | 0.945         | A0A670JY26        | Reverse transcriptase                                                                                      | 1.99%         | 143.3        |
|      | 3881        | LPLLWRSK                                              | 7.453        | 0.012         | A0A670HRL2        | Myosin IIIB                                                                                                | 0.94%         | 110.3        |
|      | 2780        | PEPERR                                                | 7.364        | 0.000         | A0A670HYR8        | Aprataxin and PNKP like factor                                                                             | 1.17%         | 57.6         |
| B    | 3284        | VATAKKPR                                              | 6.899        | -0.010        | A0A670JHJ6        | Homologous recombination factor with OB-fold                                                               | 1.17%         | 74.5         |
|      | 3898        | LPKHVANQLK                                            | 6.533        | 0.016         | A0A670IV37        | Guanylate cyclase                                                                                          | 1.54%         | 74.2         |
|      | 2774        | RASPMHR                                               | 6.408        | 0.007         | A0A670KB76        | Vasopressin V2 receptor                                                                                    | 2.00%         | 39.0         |
|      | 2959        | DEYEAHQDR                                             | 5.979        | -0.013        | A0A670HR35        | RING-type E3 ubiquitin transferase                                                                         | 1.81%         | 53.8         |
|      | 2959        | EDSGFYECR                                             | 5.979        | 0.016         | A0A670J0D7        | Interleukin 1 receptor type 1                                                                              | 1.63%         | 62.8         |
|      | 3771        | CLETPSHPEEPSDLEE                                      | 5.762        | -0.020        | A0A670IMN3        | POU domain protein                                                                                         | 2.32%         | 72.5         |
|      | 3771        | SSRPSSSQSTEGIDAGGDM                                   | 5.762        | -0.027        | A0A670K987        | Polycystin 2, transient receptor potential cation channel                                                  | 2.01%         | 107.1        |
|      | 2871        | EDQADSGDGER                                           | 5.599        | 0.002         | A0A670KJZ2        | KN motif and ankyrin repeat domains 2                                                                      | 1.16%         | 101.2        |
|      | <b>3168</b> | <b>QMIKINFK</b>                                       | <b>8.341</b> | <b>-0.005</b> | <b>A0A670KI84</b> | <b>COP9 signalosome complex subunit 2</b>                                                                  | <b>1.78%</b>  | <b>52.4</b>  |
|      | 3362        | LQDMLDGFIIK                                           | 7.876        | 0.985         | A0A670HKG3        | Eukaryotic translation initiation factor 5                                                                 | 2.55%         | 49.2         |
| C    | 3209        | VLSVLSR                                               | 7.749        | 0.001         | A0A670KIJ4        | Plexin A3                                                                                                  | 0.44%         | 201.1        |
|      | 3176        | GASGNNGGGGGGGAEGGGGGGGG<br>GGGGGGGTGESEGAIDASKNEEDEGK | 7.461        | -0.049        | A0A670KFL5        | Heterogeneous nuclear ribonucleoprotein D                                                                  | 15.11%        | 35.6         |
|      | 3100        | YLSQFPKAK                                             | 7.453        | -0.014        | A0A670JJJ1        | Filamin C                                                                                                  | 0.36%         | 268.4        |



|   |      |                      |       |        |            |                                                               |       |       |
|---|------|----------------------|-------|--------|------------|---------------------------------------------------------------|-------|-------|
|   | 2741 | QSINKPK              | 7.449 | 0.003  | A0A670IZ61 | SCY1 like pseudokinase 2                                      | 0.76% | 102.6 |
|   | 3116 | AEGSSSHVHFDEK        | 7.350 | -0.002 | A0A670IUZ2 | Chromosome 9 C20orf27 homolog                                 | 7.30% | 19.7  |
|   | 3040 | EAETHRNREMR          | 7.283 | 0.995  | A0A670HN26 | Kinesin family member 20B                                     | 0.62% | 202.9 |
|   | 3016 | DDVTYNIVCKK          | 7.220 | 1.016  | A0A670JGC4 | Receptor protein-tyrosine kinase                              | 1.09% | 112.5 |
|   | 3095 | VIEFLNEASRR          | 7.162 | -0.022 | A0A670IWZ0 | Mesoderm induction early response protein 1                   | 2.19% | 57.1  |
|   | 3036 | VLCRARK              | 7.102 | 0.017  | A0A670I7F0 | Hermansky-Pudlak syndrome 5 protein homolog                   | 0.61% | 130.7 |
|   | 3089 | YLQLFYEK             | 7.069 | -0.006 | A0A670HV88 | Stonin-2                                                      | 0.97% | 93.4  |
|   | 3071 | EENRGIVASLDCDESEIENK | 6.996 | -0.041 | A0A670HM85 | Zinc finger protein 420-like                                  | 2.93% | 77.3  |
|   | 3130 | VNTTKDQQFR           | 6.984 | 1.012  | A0A670K299 | Lipoprotein lipase                                            | 2.39% | 51.9  |
|   | 3481 | FHNPSAHNLSSAFDGMAR   | 6.966 | -0.025 | A0A670IKS2 | Cell cycle control protein                                    | 5.20% | 39.3  |
|   | 3614 | IGEISYAEKVA          | 6.963 | -0.004 | A0A670J318 | Transferrin receptor 2                                        | 1.54% | 78.6  |
|   | 2972 | TETVYLAVNYLDR        | 6.949 | 0.985  | A0A670IEP1 | Cyclin A1                                                     | 3.14% | 46.9  |
|   | 3110 | VLNLMK               | 6.932 | -0.001 | A0A670J6W9 | T-complex protein 11 homolog                                  | 1.32% | 51.4  |
|   | 3989 | PFKMECGKGFSRCSH      | 6.927 | 0.023  | A0A670HNT9 | Gastrula zinc finger protein XICGF57.1-like                   | 2.85% | 64.0  |
|   | 3208 | RLDFQLMLK            | 6.892 | 0.983  | A0A670KFA7 | Semaphorin 6D                                                 | 0.87% | 115.4 |
| C | 3104 | HNIQQILK             | 6.858 | 0.003  | A0A670KGH4 | Protein kinase cAMP-dependent type I regulatory subunit beta  | 1.68% | 53.9  |
|   | 3104 | HNIQQLLK             | 6.858 | 0.003  | A0A670I253 | Protein kinase cAMP-dependent type I regulatory subunit alpha | 2.10% | 43.3  |
|   | 3733 | TCGEGYQFRIVRCWK      | 6.837 | 0.968  | A0A670KEZ0 | ADAMTS like 2                                                 | 1.64% | 103.0 |
|   | 3172 | LTVTAYDCGKKR         | 6.812 | -0.004 | A0A670J4B0 | Calsyntenin 1                                                 | 1.35% | 99.6  |
|   | 3139 | EKEKEKEEEK           | 6.807 | 1.010  | A0A670JZR2 | THO complex subunit 2                                         | 0.68% | 168.9 |
|   | 3022 | KMGGIK               | 6.693 | 0.000  | A0A670IP53 | Signal recognition particle 54 kDa protein                    | 1.07% | 62.9  |
|   | 3294 | EASNYSRPGMGQVNGDCK   | 6.692 | 0.992  | A0A670K9R3 | SAM domain-containing protein                                 | 3.67% | 52.8  |
|   | 3913 | FAFVEVIAMIK          | 6.652 | -0.015 | A0A670IH88 | Cytoplasmic FMR1-interacting protein                          | 0.84% | 152.1 |
|   | 4113 | LRTRHRVSAGK          | 6.547 | -0.001 | A0A670KDL9 | Myosin-16                                                     | 0.57% | 221.0 |
|   | 3224 | WYRSYK               | 6.465 | -0.007 | A0A670IFP9 | ShKT domain-containing protein                                | 2.67% | 24.9  |
|   | 2973 | TTVTFDLMLGILCK       | 6.425 | 1.008  | A0A670J1D2 | Fem-1 homolog C                                               | 2.27% | 68.8  |
|   | 3044 | SIETPNVRADP          | 6.390 | -0.012 | A0A670IH45 | Delta-sarcoglycan                                             | 5.73% | 20.8  |
|   | 3143 | KDEESGSGSNPFQHLEK    | 6.364 | 0.967  | A0A670JEW1 | Coatomer subunit gamma                                        | 1.95% | 97.7  |
|   | 2948 | VKLSNVDDD            | 6.329 | 0.993  | A0A670JU92 | Protein-tyrosine-phosphatase                                  | 0.40% | 250.2 |
|   | 3195 | LYKCSSCSKSFCDQSR     | 6.328 | 0.984  | A0A670HPN8 | Zinc finger and SCAN domain-containing protein 29             | 2.06% | 89.0  |

|   |             |                        |              |              |                   |                                                               |              |             |
|---|-------------|------------------------|--------------|--------------|-------------------|---------------------------------------------------------------|--------------|-------------|
| C | 3085        | NTLRPEEK               | 6.295        | -0.009       | A0A670IIF5        | Zinc finger BED-type containing 1                             | 1.04%        | 87.5        |
|   | 2944        | FVCALGR                | 6.273        | -0.008       | A0A670J9B3        | Integrin subunit alpha 3                                      | 0.66%        | 117.9       |
|   | 3931        | CCFQGKRCCFQGK          | 6.270        | 0.024        | A0A670K425        | Pentapeptide repeat-containing protein                        | 9.49%        | 15.6        |
|   | 3078        | ASAGFGASSDSHMLDSTLKC   | 6.239        | -0.021       | A0A670JF65        | Ectopic P-granules autophagy protein 5 homolog                | 0.85%        | 278.6       |
|   | 3128        | HMFYRQPSHTFSYYGK       | 6.145        | 0.993        | A0A670IA93        | Solute carrier family 45 member 4                             | 2.03%        | 87.4        |
|   | 3020        | AEQEEYVQEGIK           | 6.107        | 0.978        | A0A670K627        | Myosin IF                                                     | 1.09%        | 126.2       |
|   | 2877        | KESSSDSTDEVK           | 6.087        | -0.005       | A0A670HVV3        | Protein-histidine N-methyltransferase                         | 2.02%        | 67.3        |
|   | 2877        | SNCSSSRLEDR            | 6.087        | 1.010        | A0A670HZK7        | ATP-dependent DNA helicase                                    | 1.11%        | 109.9       |
|   | 3717        | LSHAVELCDAGFQAYDF      | 6.045        | -0.031       | A0A670HTF6        | Valine--tRNA ligase                                           | 1.40%        | 136.8       |
|   | 4197        | PYECSDCGKSFIQK         | 6.044        | -0.024       | A0A670HLY8        | Zinc finger protein 2 homolog                                 | 2.79%        | 57.8        |
|   | 3141        | GPTRDDGTGMCERDVSK      | 6.043        | -0.031       | A0A670JQL6        | TPR_REGION domain-containing protein                          | 0.64%        | 314.6       |
|   | 3206        | TCEGEGRIEWCCSVSR       | 6.013        | 1.015        | A0A670IWD4        | S-adenosylmethionine sensor upstream of mTORC1                | 3.98%        | 46.1        |
|   | 3112        | FNNSPCEEYFPK           | 5.823        | 0.987        | M1GNS9            | V(D)J recombination-activating protein 1 (Fragment)           | 3.56%        | 38.2        |
|   | 3165        | MAATGEEDDSQNSTEPSVK    | 5.786        | -0.030       | A0A670KHF2        | Zinc finger protein 239-like                                  | 4.81%        | 45.2        |
|   | 3190        | SHCLSEGITHPKMSHSNSMHGR | 5.728        | 0.986        | A0A670I1K2        | TIAM Rac1 associated GEF 1                                    | 1.38%        | 179.1       |
|   | 4194        | PFKCMECGKSFSNNG        | 5.691        | -0.023       | A0A670JCI2        | Zinc finger protein 845-like                                  | 2.61%        | 65.6        |
|   | 3203        | SDLEDMEDEPDAAEGGSQAK   | 5.670        | 1.000        | A0A670JS10        | SMG5 nonsense mediated mRNA decay factor                      | 1.51%        | 138.9       |
|   | 3101        | QTDSSDEQDDREKNFIHN     | 5.597        | 0.971        | A0A670J7A8        | Zinc finger BED-type containing 4                             | 1.54%        | 131.2       |
|   | 3161        | VLEMYSK                | 5.388        | -0.016       | A0A670ISU3        | Exocyst complex component                                     | 0.93%        | 87.8        |
|   | 3355        | VEINLEFICECECHK        | 5.195        | 0.971        | A0A670J1K3        | Integrin beta                                                 | 2.00%        | 82.7        |
| D | <b>3157</b> | <b>YSMELHIVHTK</b>     | <b>14.85</b> | <b>0.005</b> | <b>A0A670JE51</b> | <b>Carbonic anhydrase</b>                                     | <b>4.25%</b> | <b>28.4</b> |
|   | 3661        | FHGAKAISDAEPYSR        | 7.537        | 0.002        | A0A670KHB8        | Rab-GAP TBC domain-containing protein                         | 3.40%        | 50.8        |
|   | 3207        | VLSVLSPR               | 7.230        | 0.004        | A0A670KIJ4        | Plexin A3                                                     | 0.44%        | 201.1       |
|   | 3820        | EYQLEGVNWLLFNWYNR      | 6.989        | -0.036       | A0A670JDQ2        | Chromodomain-helicase-DNA-binding protein 8                   | 0.68%        | 276.8       |
|   | 3030        | HNIQQILK               | 6.909        | 0.002        | A0A670KGH4        | Protein kinase cAMP-dependent type I regulatory subunit beta  | 1.68%        | 53.9        |
|   | 3030        | HNIQQLLK               | 6.909        | 0.002        | A0A670I253        | Protein kinase cAMP-dependent type I regulatory subunit alpha | 2.10%        | 43.3        |
|   | 3254        | LFLWWHK                | 6.899        | 0.014        | A0A670JF65        | Ectopic P-granules autophagy protein 5 homolog                | 0.28%        | 278.6       |
|   | 3713        | HQRIHTEEK              | 6.813        | 1.006        | A0A670HMX4        | Zinc finger protein 501-like                                  | 2.00%        | 51.6        |
|   | 2909        | VIEMLLK                | 6.791        | 0.013        | A0A670JEZ4        | Sodium channel protein                                        | 0.35%        | 227.7       |

|   |      |                          |       |        |            |                                                                        |       |       |
|---|------|--------------------------|-------|--------|------------|------------------------------------------------------------------------|-------|-------|
| D | 2909 | VLEMLLK                  | 6.791 | 0.013  | A0A670J0E0 | Sodium channel protein                                                 | 0.40% | 200.7 |
|   | 3816 | MADPAAAAATAGAPSGSEEGEPVR | 6.731 | 1.029  | A0A670KGA4 | Protein kinase C                                                       | 3.68% | 77.1  |
|   | 3084 | VLQMVK                   | 6.534 | 0.002  | A0A670IQN7 | UDP-glucose 4-epimerase                                                | 1.73% | 38.3  |
|   | 3184 | RLFLCDLAGSERCTR          | 6.364 | 1.003  | A0A670HPG8 | Kinesin family member 20B                                              | 0.84% | 203.4 |
| E | 3381 | QMIKINFK                 | 9.012 | -0.012 | A0A670KI84 | COP9 signalosome complex subunit 2                                     | 1.78% | 52.4  |
|   | 3515 | DLVVIDDR                 | 8.391 | 0.018  | A0A670HZU9 | FIG4 phosphoinositide 5-phosphatase                                    | 0.88% | 103.4 |
|   | 3394 | LTEAYKCLSKAK             | 8.365 | -0.028 | A0A670JJV1 | Intraflagellar transport 140                                           | 0.83% | 164.0 |
|   | 3519 | AHGAGGGGGSGRCCMGKSGK     | 8.162 | 0.005  | A0A670IRY6 | Mothers against decapentaplegic homolog                                | 4.60% | 50.7  |
|   | 2945 | HDCISR                   | 7.949 | -0.005 | A0A670JVT7 | Otogelin like                                                          | 0.27% | 249.2 |
|   | 3204 | VTTEEFMNTK               | 7.654 | 0.016  | A0A670J1G8 | Chloride channel protein                                               | 1.44% | 77.3  |
|   | 2794 | KCPRSNR                  | 7.413 | 0.010  | A0A670I187 | Transmembrane protein with EGF like and two follistatin like domains 2 | 1.86% | 41.4  |
|   | 3291 | AEGSSSHVHFDEK            | 7.400 | -0.007 | A0A670IUZ2 | Chromosome 9 C20orf27 homolog                                          | 7.30% | 19.7  |
|   | 2912 | QDSQESMR                 | 7.163 | 1.020  | A0A670HNM6 | Elongator complex protein 4                                            | 1.93% | 45.5  |
|   | 3401 | VATAKKPR                 | 7.121 | -0.010 | A0A670JHJ6 | Homologous recombination factor with OB-fold                           | 1.17% | 74.5  |
|   | 3401 | VLSVLSPR                 | 7.121 | 0.001  | A0A670KIJ4 | Plexin A3                                                              | 0.44% | 201.1 |
|   | 3658 | PMVVRVID                 | 7.081 | -0.000 | A0A670J6W6 | Methylcytosine dioxygenase TET                                         | 0.55% | 159.8 |
|   | 3076 | ESDSSERR                 | 6.987 | -0.002 | A0A670KMM8 | Chromosome 11 open reading frame 57                                    | 2.68% | 34.8  |
|   | 3115 | FGDMTNEEFR               | 6.971 | -0.024 | A0A670JKL2 | CATL1 protein                                                          | 2.96% | 38.4  |
|   | 3282 | VLNLMK                   | 6.944 | -0.002 | A0A670J6W9 | T-complex protein 11 homolog                                           | 1.32% | 51.4  |
|   | 3251 | HNIQQILK                 | 6.803 | -0.002 | A0A670KGH4 | Protein kinase cAMP-dependent type I regulatory subunit beta           | 1.68% | 53.9  |
|   | 3251 | HNIQQLLK                 | 6.803 | -0.002 | A0A670I253 | Protein kinase cAMP-dependent type I regulatory subunit alpha          | 2.10% | 43.3  |
|   | 2940 | QSSQKCSDNNGSGESDG        | 6.768 | -0.018 | A0A670IVS8 | Spalt like transcription factor 4                                      | 1.54% | 111.9 |
|   | 3463 | WYRSYK                   | 6.752 | -0.007 | A0A670IFP9 | ShKT domain-containing protein                                         | 2.67% | 24.9  |
|   | 4194 | KAFAATCSCGRAAPCCR        | 6.608 | 0.023  | A0A670HVG1 | Gastrin/cholecystokinin type B receptor                                | 4.16% | 45.1  |
|   | 2952 | KESSSDSTDEVK             | 6.535 | -0.009 | A0A670HVV3 | Protein-histidine N-methyltransferase                                  | 2.02% | 67.3  |
|   | 3271 | CESSIEQMCFVAA            | 6.458 | 1.004  | A0A670JGT0 | Oxysterol-binding protein                                              | 1.72% | 85.5  |
|   | 2973 | YQMCPK                   | 6.427 | 1.013  | A0A670IBU2 | Mucin 6, oligomeric mucus/gel-forming                                  | 0.18% | 353.6 |
|   | 3254 | WHENIYCGTPSSPK           | 6.291 | 1.021  | A0A670J793 | Oxysterol-binding protein                                              | 1.58% | 101.5 |
|   | 3439 | SPSAINESDQNSTK           | 6.090 | 0.984  | A0A670I767 | Spermatogenesis associated serine rich 2 like                          | 2.51% | 62.1  |

|   |      |                     |       |       |            |                                                  |       |       |
|---|------|---------------------|-------|-------|------------|--------------------------------------------------|-------|-------|
| E | 3589 | WTEDIQMAIDLAENCNG   | 5.812 | 0.981 | A0A670KCN5 | FERM, ARH/RhoGEF and pleckstrin domain protein 1 | 1.64% | 118.0 |
| E | 3529 | ESLGDSTSEEEGGVTESEK | 5.796 | 1.006 | A0A670K8M4 | Phosphatidate phosphatase                        | 2.10% | 100.0 |
| E | 3383 | SSSADFSDDDDFSQKSGSL | 5.479 | 0.996 | A0A670IAF5 | Dystonin                                         | 0.30% | 713.7 |
